# Supplementary material for: Conversion of biomass-derived sugars to 1,1,2-trialkoxyethane via a [2 + 4] retro-aldol reaction over alkaline and alkaline earth metal salts of phosphotungstic acid
Source: Royal Society of Chemistry journal article supplement (doi:10.1039/d3gc00587a), 2023-01-01
Supplement: d3gc00587a1.pdf [file d3gc00587a1.pdf]

Supporting Information of  
Conversion of Biomass-derived Sugars to 1,1,2-Trialkoxyethane via [2+4]  
Retro-aldol Reaction over Alkaline and Alkaline Earth Metal Salt of  
Phosphotungstic Acid

Tihang Liu <sup>[a]</sup>, Jiangang Wang <sup>[a]</sup>, Hongyou Cui <sup>[a]\*</sup>, Jinghua Wang <sup>[a, b] \*</sup>

a School of Chemistry and Chemical Engineering, Shandong University of Technology, Zibo 255000, China.

b Shandong Lunan Coal Chemical Research Institute of Engineering and Technology, Zaozhuang University,  
Zaozhuang, 277160, China.

Email: [cuihy@sdut.edu.cn](mailto:cuihy@sdut.edu.cn)

[wangjh720422@126.com](mailto:wangjh720422@126.com)

## Tables

Table S1 Comparison of the specific surface area of cesium phosphotungstates with literature results

Table S1 Comparison of the specific surface area of cesium phosphotungstates with literature results

| Catalyst                              | Specific surface area, m <sup>2</sup> /g | Ref       |
|---------------------------------------|------------------------------------------|-----------|
| HPW                                   | 8                                        | 1         |
| HPW                                   | 3.9                                      | 2         |
| Cs <sub>2</sub> HPW                   | 3.3                                      | 2         |
| Cs <sub>2</sub> HPW                   | 26                                       | 3         |
| Cs <sub>2.5</sub> H <sub>0.5</sub> PW | 13.4                                     | 2         |
| Cs <sub>2.5</sub> H <sub>0.5</sub> PW | 110                                      | 4         |
| Cs <sub>2.5</sub> H <sub>0.5</sub> PW | 83                                       | 3         |
| Cs <sub>2.5</sub> H <sub>0.5</sub> PW | 128                                      | 5         |
| Cs <sub>3</sub> PW                    | 127                                      | 2         |
| Cs <sub>2</sub> HPW                   | 74.24                                    | This work |

1. H. Yuan and Q. Shu, *Applied Mechanics and Materials*, 2013, **291**, 300-306.
2. M. J. da Silva, N. P. G. Lopes, S. O. Ferreira, R. C. Da Silva, R. Natalino, D. M. Chaves and M. G. Texeira, *Chemical Papers*, 2020, **75**, 153-168.
3. M. J. da Silva, A. A. Rodrigues and N. P. G. Lopes, *Chemistry*, 2023, **5**, 662-690.
4. S. Sandesh, P. Manjunathan, A. B. Halgeri and G. V. Shanbhag, *RSC Advances*, 2015, **5**, 104354-104362.
5. M. Kimura, T. Nakato and T. Okuhara, *Applied Catalysis A: General*, 1997, **165**, 227-240.

## Figures

Fig. S1 A typical gas chromatogram of the reaction product

Fig. S2 EDS mapping of the fresh and spent Cs<sub>2</sub>HPW catalysts

Fig. S3 EDS spectra of the fresh and spent Cs<sub>2</sub>HPW catalysts

Fig. S4 N<sub>2</sub> adsorption-desorption isotherms and pore size distribution of HPW and Cs<sub>x</sub>H<sub>3-x</sub>PW

Fig. S5 GC-MS spectra of the reaction product of glucose conversion in 1-propanol

Fig. S6 GC-MS spectra of the reaction product of glucose conversion in 2-propanol

Fig. S7 GC-MS spectra of the reaction product of glucose conversion in 1-butanol

Fig. S8 TG curves of the Cs<sub>x</sub>H<sub>3-x</sub>PW samples

Fig. S9 Effect of glucose concentration

Fig. S10 Color change of reaction mixture with different glucose concentration

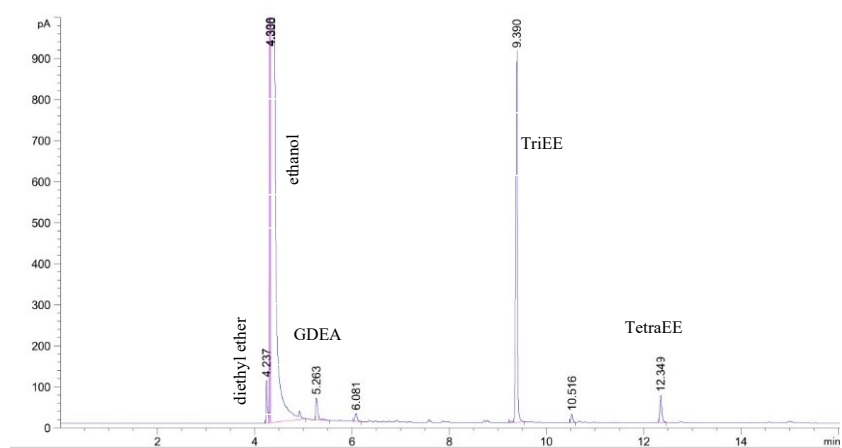

Fig. S1 A typical gas chromatogram of the reaction product

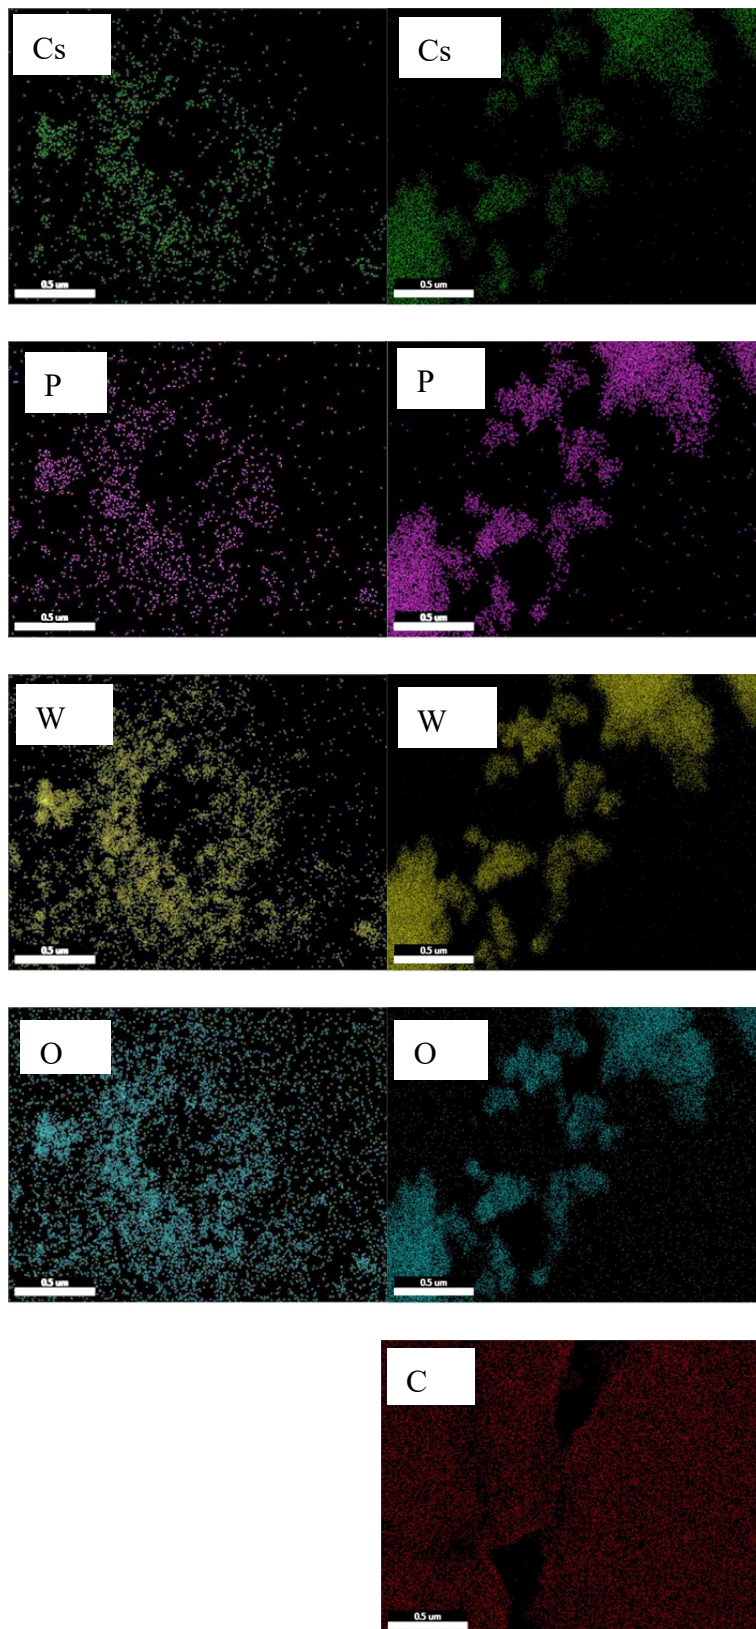

Fig. S2 EDS mapping of the fresh  $\text{Cs}_2\text{HPW}$  catalyst (left) and the spent  $\text{Cs}_2\text{HPW}$  catalyst (right)

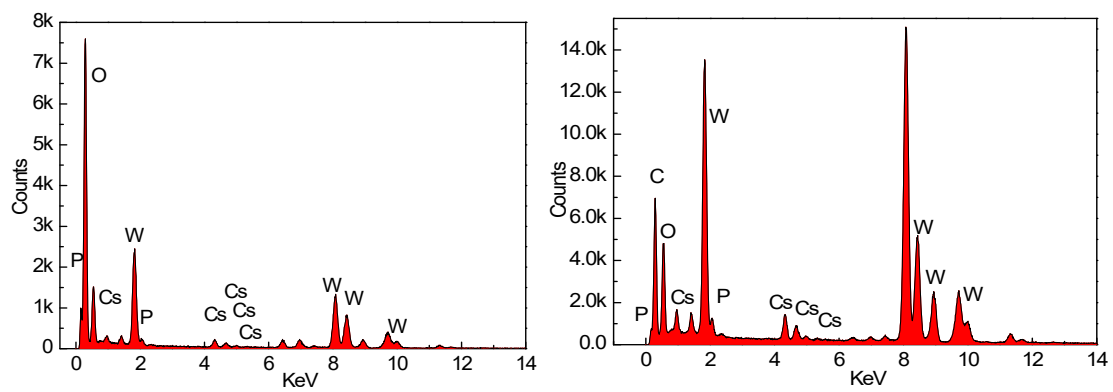

Fig. S3 EDS spectra of the fresh  $\text{Cs}_2\text{HPW}$  catalyst (left) and the spent catalyst  $\text{Cs}_2\text{HPW}$  (right)

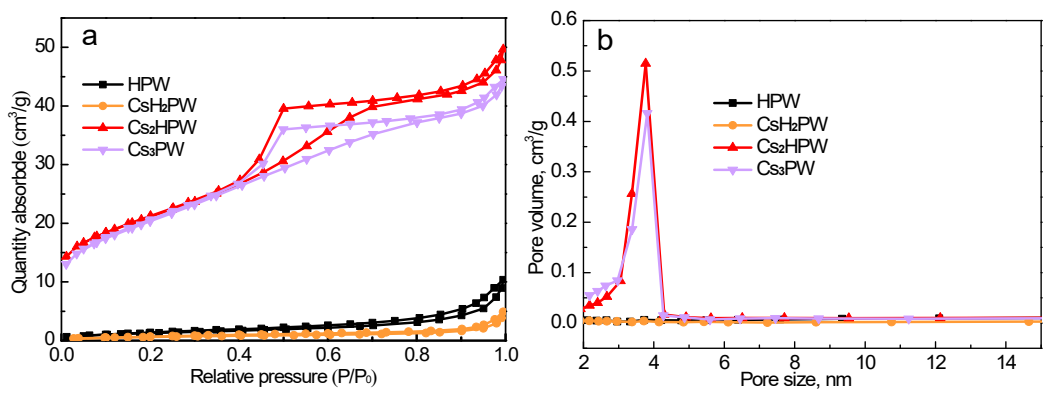

Fig. S4 N<sub>2</sub> adsorption-desorption isotherms and pore size distribution of HPW and Cs<sub>x</sub>H<sub>3-x</sub>PW



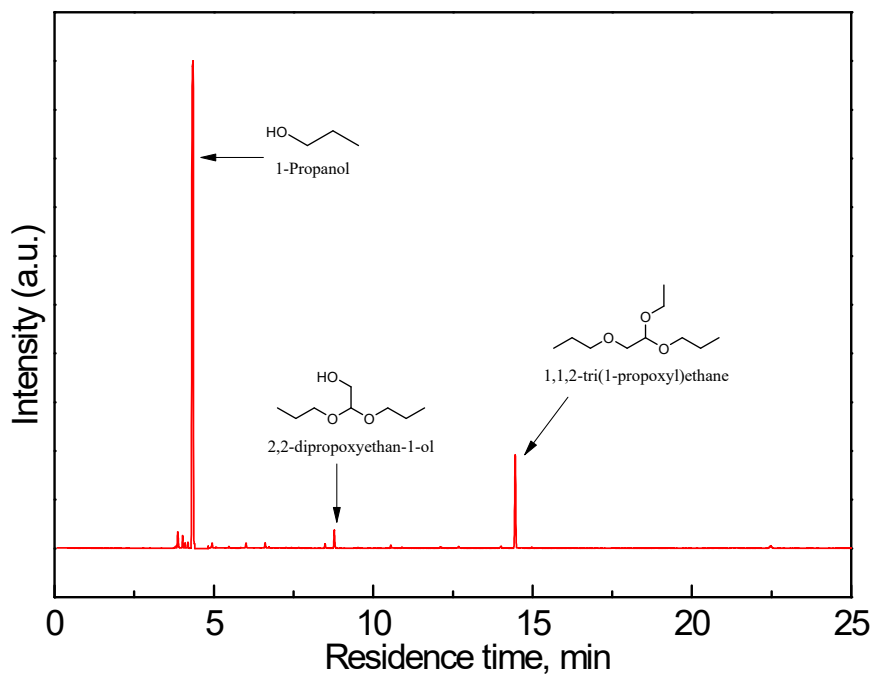

1-Propanol

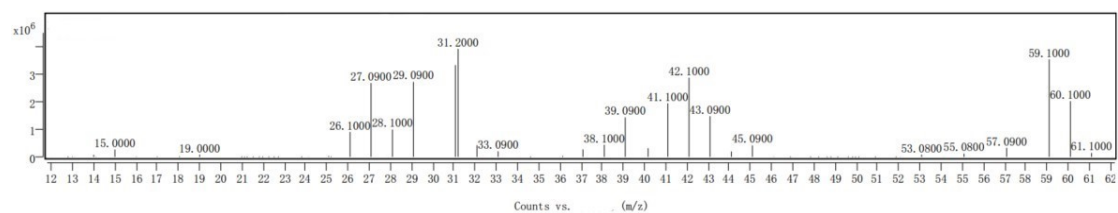

2,2-dipropoxyethan-1-ol

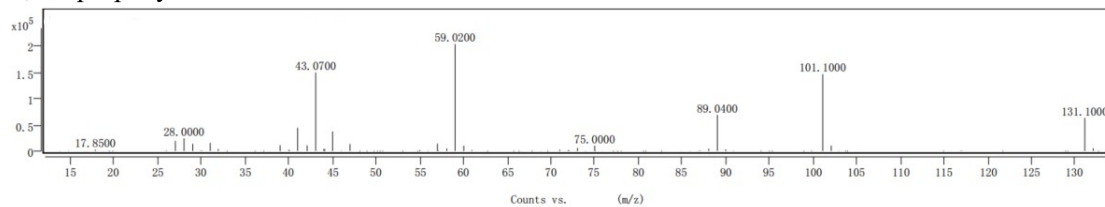

1,1,2-tri(1-propoxyl)ethane

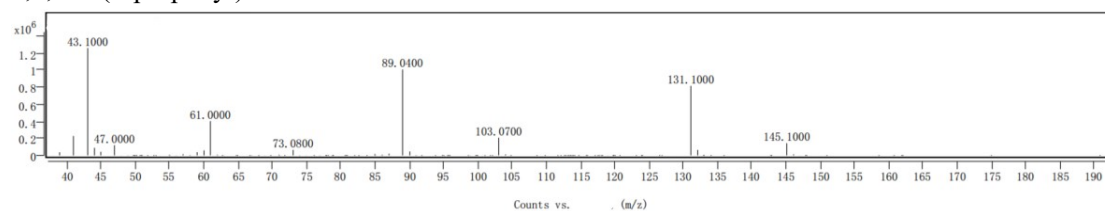

Fig. S5 GC-MS spectra of the reaction product of glucose conversion in 1-propanol

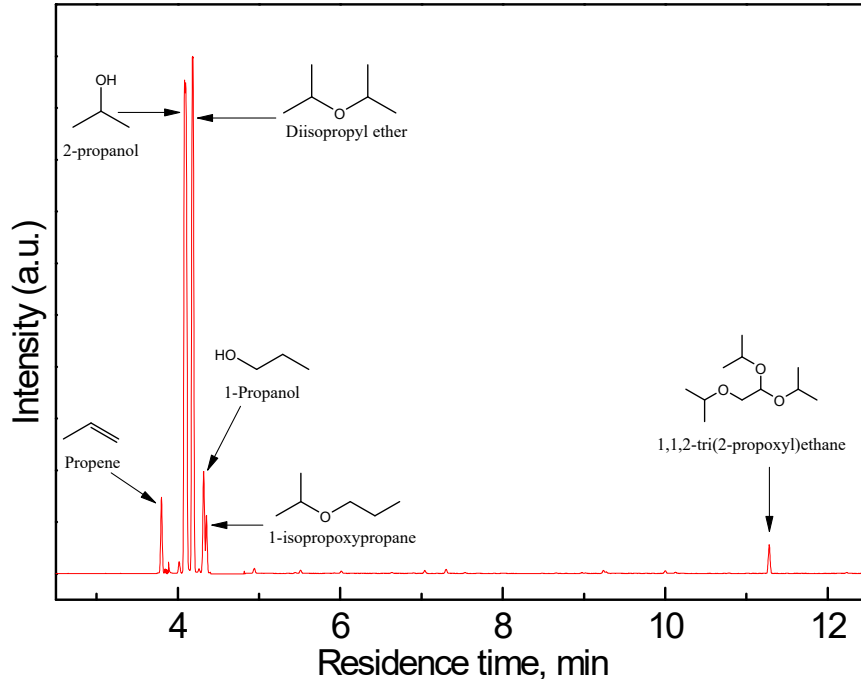

Propene

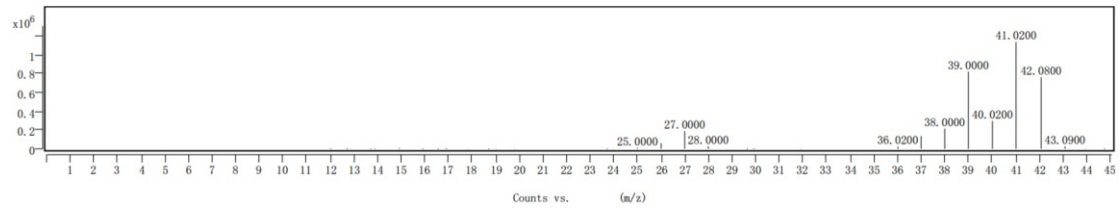

2-propanol

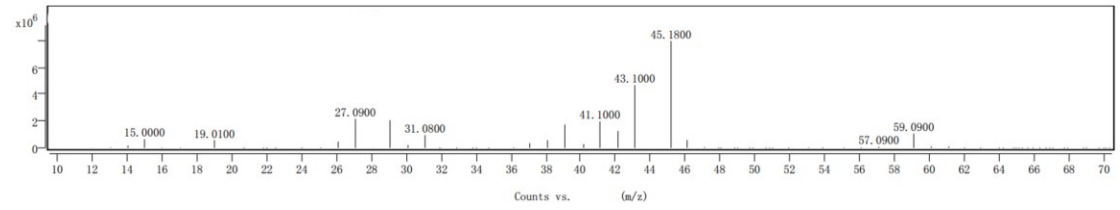

Diisopropyl ether

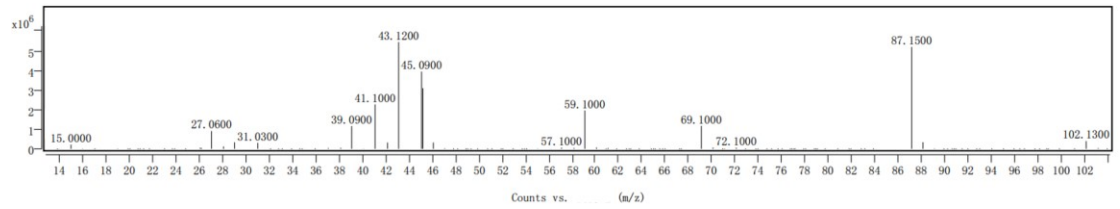

1-Propanol

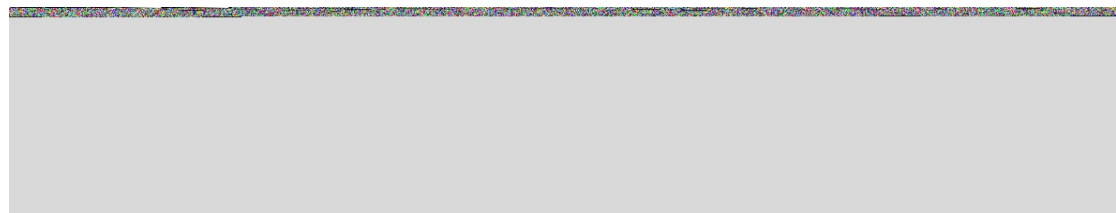

1-isopropoxypropane

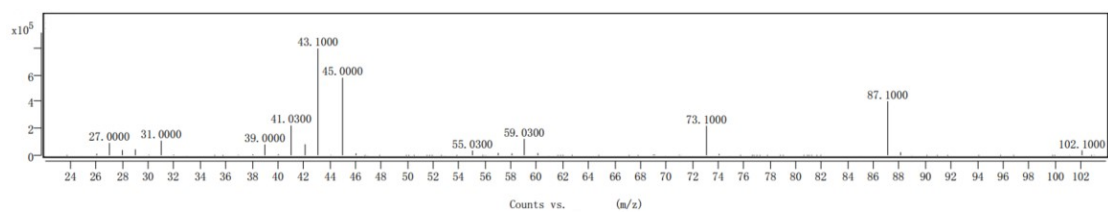

1,1,2-tri(2-propoxyl)ethane

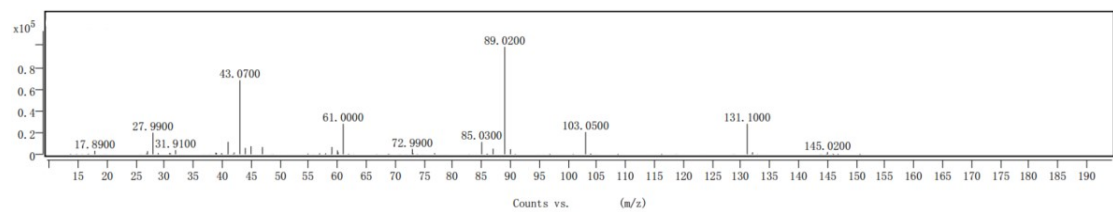

Fig. S6 GC-MS spectra of the reaction product of glucose conversion in 2-propanol

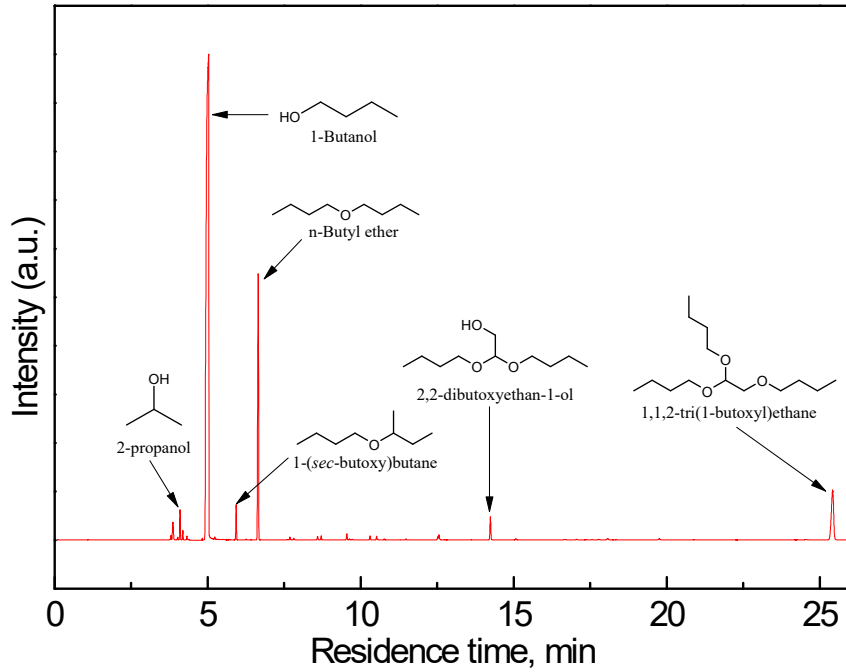

1-Butanol

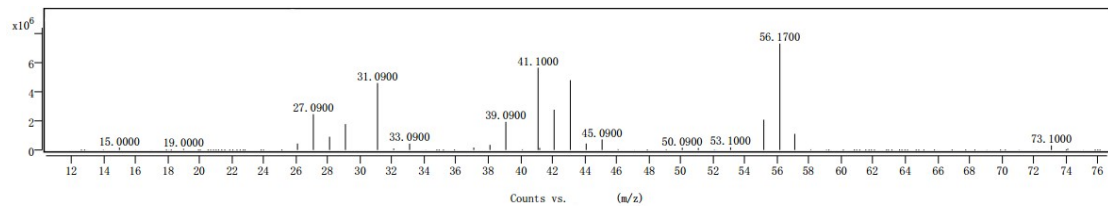

1-(sec-butoxy)butane

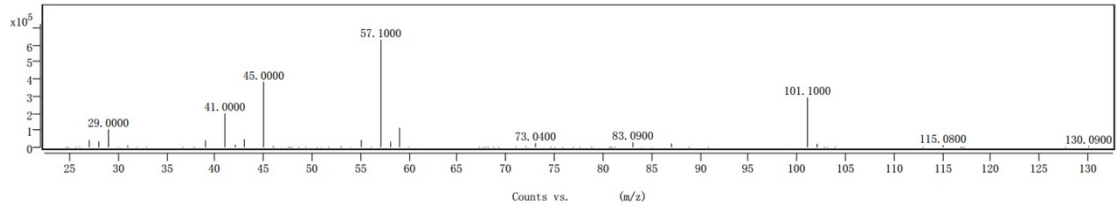

n-Butyl ether

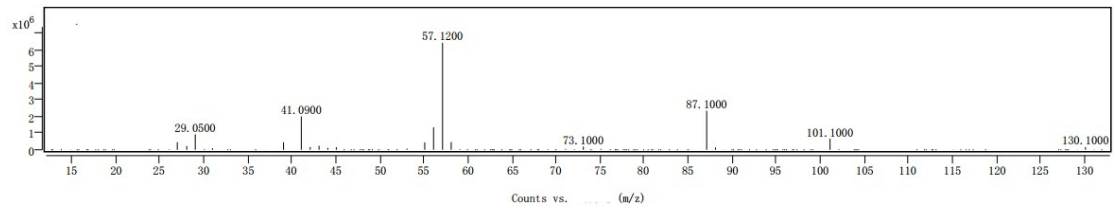

2,2-dibutoxyethan-1-ol

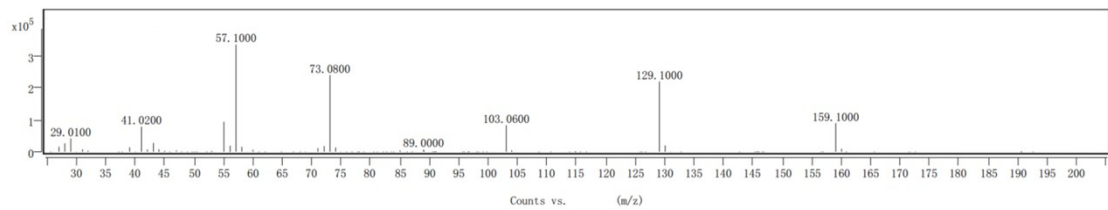

1,1,2-tri(1-butoxy)ethane

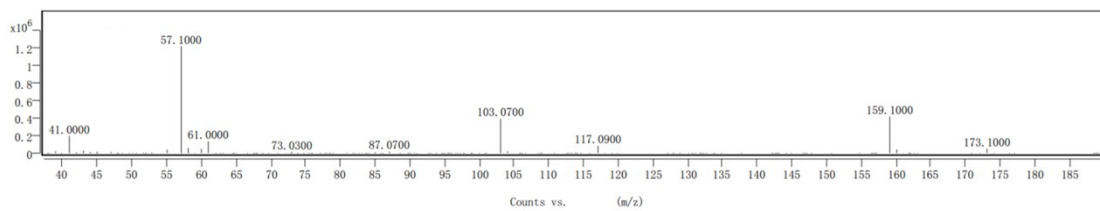

Fig. S7 GC-MS spectra of the reaction product of glucose conversion in 1-butanol

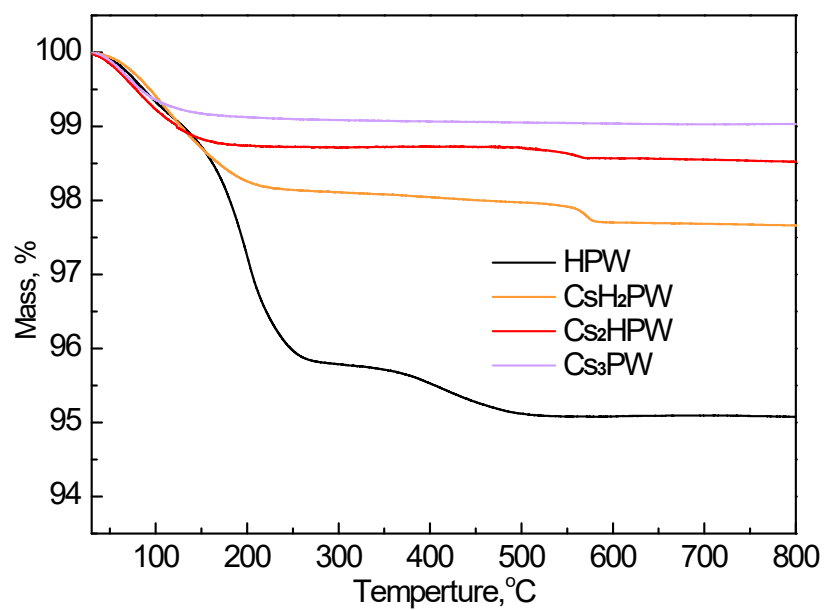

Fig. S8 TG curves of the Cs<sub>x</sub>H<sub>3-x</sub>PW samples

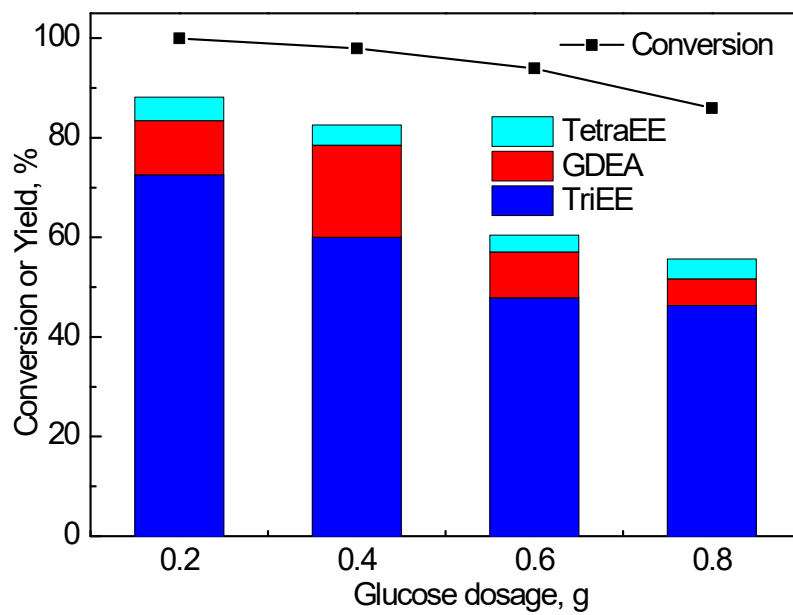

Fig. S9 Effect of glucose concentration

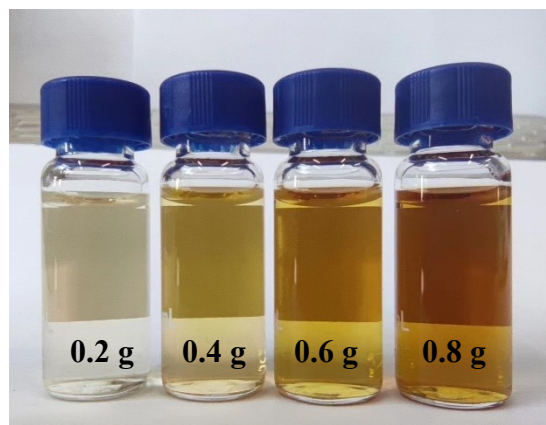

Fig. S10 Color change of reaction mixture with different glucose concentration
